# Supplementary material
Source: publisher site journal article supplement (https://www.dovepress.com/get_supplementary_file.php?f=217045.docx)
Supplement: Supplementary file 1 [file get_supplementary_file.php]

**Supplementary Table S1**

|  | **Placebo** | **Ibuprofen** | **Ibuprofen + caffeine** |
| --- | --- | --- | --- |
| **All patients** | | | |
| Number of patients, N | 126 | 253 | 256 |
| **Descriptive statistics for POMWPAUC72h** | | | |
| Mean1 POMWPAUC72h (SD) | 5.014 (1.5648) | 4.604 (1.6381) | 4.528 (1.4547) |
| **ANCOVA for POMWPAUC72h** | | | |
| Adjusted2 mean (SE) | 4.800 (0.1266) | 4.461 (0.0942) | 4.512 (0.0931) |
| Treatment contrast ibuprofen + caffeine versus comparator3 | -0.288 | 0.051 |  |
| 95% CI | (-0.572, -0.003) | (-0.180, 0.282) |  |
| *P-*value | 0.0474 | 0.6658 |  |
| **Country subgroup (ANCOVA)2** | | | |
| **Germany** | | | |
| Number of patients, N | 104 | 207 | 208 |
| Adjusted LS mean POMWPAUC72h (SE)4 | 5.017 (0.1397) | 4.573 (0.0991) | 4.606 (0.0991) |
| Treatment contrast ibuprofen + caffeine versus comparator3 | -0.411 | 0.033 |  |
| 95% CI | (-0.749, -0.074) | (-0.242, 0.308) |  |
| *P-*value | 0.0169 | 0.8146 |  |
| **Russia** | | | |
| Number of patients, N | 22 | 46 | 48 |
| Adjusted LS mean POMWPAUC72h (SE)4 | 4.407 (0.1577) | 4.551 (0.1091) | 4.665 (0.107) |
| Treatment contrast ibuprofen + caffeine versus comparator | 0.248 | 0.104 |  |
| 95% CI | (-0.130, 0.626) | -0.199, 0.408) |  |
| *P-*value | 0.1955 | 0.4972 |  |
| **Worst procedure site subgroup (ANCOVA)2** | | | |
| **Back** |  |  |  |
| Number of patients, N | 67 | 140 | 138 |
| Adjusted LS mean POMWPAUC72h (SE)4 | 5.064 (0.1800) | 4.513 (0.1318) | 4.628 (0.1315) |
| Treatment contrast ibuprofen + caffeine versus comparator | -0.436 | 0.115 |  |
| 95% CI | (-0.834, -0.039) | (-0.203, 0.433) |  |
| *P-*value | 0.0316 | 0.4782 |  |
| **Neck** |  |  |  |
| Number of patients, N | 59 | 113 | 118 |
| Adjusted LS mean POMWPAUC72h (SE)4 | 4.520 (0.1791) | 4.426 (0.1353) | 4.395 (0.1321) |
| Treatment contrast ibuprofen + caffeine versus comparator | -0.125 | -0.030 |  |
| 95% CI | (-0.535, 0.285) | (-0.369, 0.308) |  |
| *P-*value | 0.5485 | 0.8597 |  |

**Supplementary Table S1** POMWPAUC72h (Treated set).

**Legend:** 1 Higher values for AUC indicate higher pain
2 The ANCOVA includes treatment, country (where applicable), and worst procedure site (where applicable) as fixed effects and baseline POMWP as a continuous covariate. A higher mean indicates higher pain
3 A negative treatment contrast favors ibuprofen + caffeine
4 Higher LS mean indicates higher pain and negative treatment contrast favors ibuprofen + caffeine

**Abbreviations:** ANCOVA, analysis of covariance; AUC, area under curve; CI, confidence interval; LS, least squares; POM, pain on movement; SE, standard error.

**Supplementary Table S2**

|  | **Placebo** | **Ibuprofen** | **Ibuprofen + caffeine** |
| --- | --- | --- | --- |
| **All patients** | | | |
| Number of patients, N | 126 | 253 | 256 |
| **Descriptive statistics for POMWPAUC120h** | | | |
| Mean1 (SD) | 4.562 (1.6358) | 4.036 (1.6808) | 3.977 (1.4788) |
| **ANCOVA for POMWPAUC72h** | | | |
| Adjusted2 POMWPAUC120h mean (SE) | 4.175 (0.1334) | 3.718 (0.0992) | 3.776 (0.0981) |
| Treatment contrast ibuprofen + caffeine versus comparator | -0.399 | 0.058 |  |
| 95% CI | (-0.698, -0.100) | (-0.185, 0.302) |  |
| *P-*value | 0.0091 | 0.6387 |  |
| **Country subgroup (ANCOVA)2** | | | |
| **Germany** | | | |
| Number of patients, N | 104 | 207 | 208 |
| Adjusted LS mean POMWPAUC120h (SE)4 | 4.648 (0.1468) | 4.119 (0.1041) | 4.168 (0.1041) |
| Treatment contrast ibuprofen + caffeine versus comparator | -0.480 | 0.049 |  |
| 95% CI | (-0.834, -0.126) | (-0.240, 0.338) |  |
| *P-*value | 0.0080 | 0.7386 |  |
| **Russia** | | | |
| Number of patients, N | 22 | 46 | 48 |
| Adjusted LS mean POMWPAUC120h (SE)4 | 3.611 (0.1777) | 3.483 (0.1229) | 3.590 (0.1206) |
| Treatment contrast ibuprofen + caffeine versus comparator | -0.021 | 0.107 |  |
| 95% CI | (-0.447, 0.405) | (-0.234, 0.449) |  |
| *P-*value | 0.9233 | 0.5347 |  |
| **Worst procedure site subgroup (ANCOVA)2** | | | |
| **Back** |  |  |  |
| Number of patients, N | 67 | 140 | 138 |
| Adjusted LS mean POMWPAUC120h (SE)4 | 4.458 (0.1918) | 3.775 (0.1404) | 3.918 (0.1402) |
| Treatment contrast ibuprofen + caffeine versus comparator | -0.540 | 0.143 |  |
| 95% CI | (-0.963, -0.116) | (-0.196, 0.482) |  |
| *P-*value | 0.0127 | 0.4060 |  |
| **Neck** |  |  |  |
| Number of patients, N | 59 | 113 | 118 |
| Adjusted LS mean POMWPAUC120h (SE)4 | 3.884 (0.1858) | 3.684 (0.1403) | 3.634 (0.1370) |
| Treatment contrast ibuprofen + caffeine versus comparator | -0.250 | -0.050 |  |
| 95% CI | (-0.675, 0.175) | (-0.401, 0.301) |  |
| *P-*value | 0.2480 | 0.7802 |  |

**Supplementary Table S2** POMWPAUC120h (Treated set).

**Legend:** 1 Higher values for AUC indicate higher pain.
2 The ANCOVA includes treatment, country (where applicable), and worst procedure site as fixed effects and baseline POMWP as a continuous covariate. A higher mean indicates higher pain.
3 A negative treatment contrast favors ibuprofen + caffeine.
4 Higher LS mean indicates higher pain and negative treatment contrast favors ibuprofen + caffeine.

**Abbreviations:** ANCOVA, analysis of covariance; AUC, area under curve; CI, confidence interval; LS, least squares; POM, pain on movement; SD, standard deviation; SE, standard error.

**Supplementary Table S3** Adjusted means for change in pressure algometry (N/cm2; with 1 N/cm2 = 10 kilopascal (kPa) ) between baseline and day 2 (morning, 2 hours after drug intake) (Treated set)

|  | **Placebo** | **Ibuprofen** | **Ibuprofen + caffeine** |
| --- | --- | --- | --- |
| **All patients** | | | |
| Number of patients, N | 126 | 251 | 256 |
| Mean PA baseline (SE) | 16.70 (0.417) | 17.45 (0.297) | 16.78 (0.300) |
| **MMRM for pressure algometry** | | | |
| Adjusted1 mean (SE) change from baseline to day 2 | -3.734 (0.6107) | -3.331 (0.4396) | -3.175 (0.4366) |
| Treatment contrast ibuprofen + caffeine versus comparator2 | 0.559 | 0.156 |  |
| 95% CI | (-0.861, 1.979) | (-1.002, 1.314) |  |
| *P-*value | 0.4398 | 0.7911 |  |
| **Worst procedure site subgroup** | | | |
| **Back** | | | |
| Number of patients, N | 67 | 139 | 138 |
| Mean PA baseline (SE) | 16.89 (0.588) | 17.55 (0.422) | 17.71 (0.400) |
| Adjusted LS mean (SE) change in POMWP from baseline to day 23 | -2.743 (0.8608) | -4.077 (0.6081) | -3.331 (0.6090) |
| Treatment contrast ibuprofen + caffeine versus comparator | -0.588 | 0.746 |  |
| 95% CI | (-2.577, 1.402) | (-0.851, 2.343) |  |
| *P-*value | 0.5618 | 0.3590 |  |
| **Neck** | | | |
| Number of patients, N | 59 | 112 | 118 |
| Mean PA baseline (SE) | 16.47 (0.592) | 17.32 (0.414) | 15.69 (0.433) |
| Adjusted LS mean (SE) change in POMWP from baseline to day 23 | -4.795 (0.8569) | -2.330 (0.6325) | -3.058 (0.6229) |
| Treatment contrast ibuprofen + caffeine versus comparator | 1.736 | -0.729 |  |
| 95% CI | (-0.284, 3.757) | (-2.414, 0.957) |  |
| *P-*value | 0.0918 | 0.3956 |  |

**Supplementary Table S3** Adjusted means for change in pressure algometry (N/cm2; with 1 N/cm2 = 10 kilopascal (kPa) ) between baseline and day 2 (morning, 2 hours after drug intake) (Treated set).

**Legend:** 1 MMRM model includes fixed, categorical effects of treatment, country, worst procedure site (where applicable), time and interaction terms for treatment-by-time as well as the continuous fixed covariates of baseline pressure algometry and baseline-by-time interaction, using unstructured covariance matrix. A negative mean indicates an improvement in pressure algometry.
2 A negative treatment contrast favors ibuprofen + caffeine.
3 Negative LS mean indicates improvement in PA (N/cm^2) and a negative treatment contrast favors Ibuprofen + caffeine.

**Abbreviations:** CI, confidence interval; LS, least squares; MMRM, mixed model for repeated measures; PA, pressure algometry; POM, pain on movement; SE, standard error.

**Supplementary Table S4**

|  | **Placebo** | **Ibuprofen** | **Ibuprofen + caffeine** |
| --- | --- | --- | --- |
| **All patients1** | | | |
| Number of patients, N | 126 | 253 | 256 |
| **Patients with a decrease of ≥30%, N (%)** | 49 (38.9) | 111 (43.9) | 101 (39.5) |
| Odds ratio of ibuprofen + caffeine versus comparator (95% CI) | 1.028  (0.663, 1.592) | 0.834  (0.586, 1.187) |  |
| *P-*value | 0.9022 | 0.3129 |  |
| **Patients with a decrease of ≥50%, N (%)** | 17 (13.5) | 59 (23.3) | 44 (17.2) |
| Odds ratio of ibuprofen + caffeine versus comparator (95% CI) | 1.354 (0.736, 2.494) | 0.680 (0.437, 1.057) |  |
| *P-*value | 0.3301 | 0.0864 |  |
| **Worst procedure site subgroup2** | | | |
| **Back** | | | |
| Number of patients, N | 67 | 140 | 138 |
| **Patients with a decrease of ≥30%, N (%)** | 21 (31.3) | 63 (45.0) | 56 (40.6) |
| Odds ratio of ibuprofen + caffeine versus comparator (95% CI) | 1.514 (0.814, 2.816) | 0.834 (0.517, 1.346) |  |
| *P-*value | 0.1900 | 0.4576 |  |
| **Patients with a decrease of ≥50%, N (%)** | 6 (9.0) | 34 (24.3) | 25 (18.1) |
| Odds ratio of ibuprofen + caffeine versus comparator (95% CI) | 2.333 (0.901, 6.041) | 0.683 (0.378, 1.232) |  |
| *P-*value | 0.0810 | 0.2052 |  |
| **Neck** | | | |
| Number of patients, N | 59 | 113 | 118 |
| **Patients with a decrease of ≥30%, N (%)** | 28 (47.5) | 48 (42.5) | 45 (38.1) |
| Odds ratio of ibuprofen + caffeine versus comparator (95% CI) | 0.682 (0.363, 1.284) | 0.835 (0.493, 1.413) |  |
| *P-*value | 0.2360 | 0.5013 |  |
| **Patients with a decrease of ≥50%, N (%)** | 11 (18.6) | 25 (22.1) | 19 (16.1) |
| Odds ratio of ibuprofen + caffeine versus comparator (95% CI) | 0.841 (0.369, 1.917) | 0.676 (0.347, 1.317) |  |
| *P-*value | 0.6800 | 0.2497 |  |

**Supplementary Table S4** Decrease in POMWP of at least 30% or 50% between baseline and day 2 (Treated set).

**Legend:** 1 The logistic regression model was adjusting for country and worst procedure site. Odds ratio >1 indicates better efficacy for ibuprofen + caffeine than for the comparator.
2 Results based on the logistic regression model adjusting for country. Likelihood-ratio test used to test treatment differences. Adjusted odds ratios together with 95% Wald CI used to quantify treatment effect, comparing ibuprofen + caffeine to the comparators ibuprofen and placebo, respectively. Odds ratios >1 favors the combination.

**Abbreviations:** CI, confidence interval.

**Supplementary Table S5**

|  | **Placebo** | **Ibuprofen** | **Ibuprofen + caffeine** |
| --- | --- | --- | --- |
| **All patients** | | | |
| **Patients with first meaningful POMWP relief, categories1** | | | |
| 0 to ≤10 min (patients entering interval, N [%]) | 126 (100.0) | 252 (99.6) | 256 (100.0) |
| Patients with first meaningful relief | 2 (1.6) | 2 (0.8) | 2 (0.8) |
| Censored patients | 0 | 0 | 1 (0.4) |
| >10 to ≤20 min (patients entering interval, N [%]) | 124 (98.4) | 250 (98.8) | 253 (98.8) |
| Patients with first meaningful relief | 2 (1.6) | 5 (2.0) | 3 (1.2) |
| Censored patients | 0 | 0 | 0 |
| >20 to ≤30 min (patients entering interval, N [%]) | 122 (96.8) | 245 (96.8) | 250 (97.7) |
| Patients with first meaningful relief | 2 (1.6) | 6 (2.4) | 5 (2.0) |
| Censored patients | 0 | 0 | 1 (0.4) |
| >30 to ≤60 min (patients entering interval, N [%]) | 120 (95.2) | 239 (94.5) | 244 (95.3) |
| Patients with first meaningful relief | 7 (5.6) | 23 (9.1) | 14 (5.5) |
| Censored patients | 0 | 0 | 1 (0.4) |
| >60 to ≤120 min (patients entering interval, N [%]) | 113 (89.7) | 216 (85.4) | 229 (89.5) |
| Patients with first meaningful relief | 11 (8.7) | 21 (8.3) | 26 (10.2) |
| Censored patients | 102 (81.0) | 195 (77.1) | 203 (79.3) |
| **Worst procedure site subgroup** | | | |
| **Back** |  |  |  |
| 0 to ≤10 min (patients entering interval, N [%]) | 67 (100) | 139 (99.3) | 138 (100) |
| Patients with first meaningful relief | 1 (1.5) | 1 (0.7) | 0 |
| Censored patients | 0 | 0 | 0 |
| >10 to ≤20 min (patients entering interval, N [%]) | 66 (98.5) | 138 (98.6) | 138 (100) |
| Patients with first meaningful relief | 0 | 3 (2.1) | 3 (2.2) |
| Censored patients | 0 | 0 | 0 |
| >20 to ≤30 min (patients entering interval, N [%]) | 66 (98.5) | 135 (96.4) | 135 (97.8) |
| Patients with first meaningful relief | 1 (1.5) | 4 (2.9) | 3 (2.2) |
| Censored patients | 0 | 0 | 1 (1.7) |
| >30 to ≤60 min (patients entering interval, N [%]) | 65 (97.0) | 131 (93.6) | 131 (94.9) |
| Patients with first meaningful relief | 2 (3.0) | 12 (8.6) | 6 (4.3) |
| Censored patients | 0 | 0 | 1 (0.7) |
| >60 to ≤120 min (patients entering interval, N [%]) | 63 (94.0) | 119 (85.0) | 124 (89.9) |
| Patients with first meaningful relief | 7 (10.4) | 8 (5.7) | 13 (9.4) |
| Censored patients | 56 (83.6) | 111 (79.3) | 111 (80.4) |
| **Neck** |  |  |  |
| 0 to ≤10 min (patients entering interval, N [%]) | 59 (100) | 113 (100) | 118 (100) |
| Patients with first meaningful relief | 1 (1.7) | 1 (0.9) | 2 (1.7) |
| Censored patients | 0 | 0 | 1 (0.8) |
| >10 to ≤20 min (patients entering interval, N [%]) | 58 (98.3) | 112 (99.1) | 115 (97.5) |
| Patients with first meaningful relief | 2 (3.4) | 2 (1.8) | 0 |
| Censored patients | 0 | 0 | 0 |
| >20 to ≤30 min (patients entering interval, N [%]) | 56 (94.9) | 110 (97.3) | 115 (97.5) |
| Patients with first meaningful relief | 1 (1.7) | 2 (1.8) | 2 (1.7) |
| Censored patients | 0 | 0 | 0 |
| >30 to ≤60 min (patients entering interval, N [%]) | 55 (93.2) | 108 (95.6) | 113 (95.8) |
| Patients with first meaningful relief | 5 (8.5) | 11 (9.7) | 8 (6.8) |
| Censored patients | 0 | 0 | 0 |
| >60 to ≤120 min (patients entering interval, N [%]) | 50 (84.7) | 97 (85.8) | 105 (89.0) |
| Patients with first meaningful relief | 4 (6.8) | 13 (11.5) | 13 (11.0) |
| Censored patients | 46 (78.0) | 84 (74.3) | 92 (78.0) |

**Supplementary Table S5** Time to first meaningful POMWP relief within 2 hour of first dose of trial medication.

**Legend:** 1 Median and 95% CI were not calculated because >50% of patients were censored. The *P-*values were 0.9384 (placebo) and 0.3534 (ibuprofen).
2 Results based on the Kaplan-Meier product-limit method stratified by country, *P-*value based on a stratified log-rank test. Limited output due to more than 50% censored patients.

**Abbreviations:** CI, confidence interval; POM, pain on movement.
